# Supplementary material for: From “minimalists” to “professional all-rounders”: Typologizing Swiss universities’ communication practices and structures
Source: publisher site journal article supplement (doi:10.1515/commun-2023-0147), 2024-07-31
Supplement: Supplementary file 1 [file appendix.docx]

**Appendix**

**Survey questionnaire**

*Intensity of university communication*

| Item / Index | Original question in the survey | English translation |
| --- | --- | --- |
| Human resources | Wie viele Personen sind insgesamt in Ihrer jetzigen Abteilung beschäftigt (inkl. Teilzeitstellen)? (offene Frage) | How many people are employed in your current department (including part-time positions)? (open-ended question) |
| Amount of  communicative output  (Cronbach’s α = .61) | In welchem Masse nutzt Ihre Abteilung die folgenden Kanäle für Ihre Kommunikationsarbeit?*   - Klassische Medienarbeit - Social Media - Webseite - Hochschulzeitung oder -zeitschrift - Imagebroschüren und Imagefilme - Jahresberichte - Ausstellungen und Veranstaltungen (z.B. Tag der offenen Tür) - Selbst entwickelte mobile Apps | To what extent does your department use the following channels to communicate?*   - Traditional media relations - Social media - Website - University newspaper or magazine - Image brochures and image films - Annual reports - Exhibitions and events (e.g., open day) - Self-developed mobile apps |
| Perceived competition among universities (Cronbach’s α = .69) | Es wird oft vom Wettbewerb zwischen Hochschulen gesprochen. Mit welchen Hochschulen steht Ihre Hochschule am ehesten im Wettbewerb?*   - Mit anderen Hochschulen des gleichen Hochschultyps in der Schweiz - Mit allen Hochschulen in der Schweiz - Mit Hochschulen in anderen Ländern   Meine Hochschule konkurriert mit anderen Hochschulen um …*   - öffentliche Gelder - ein gutes Image und öffentliche Reputation - gute Studierende und Mitarbeitende - Drittmittel   Inwieweit nehmen Sie weitere Veränderungen wahr, die sich in den vergangenen fünf bis zehn Jahren an Ihrer Hochschule eingestellt haben?**   - Der Wettbewerb zwischen meiner Hochschule und anderen Hochschulen hat zugenommen | We often hear about competition between universities. With which universities is your university competing the most?*   - With other Swiss universities of the same type - With all universities in Switzerland - With universities in other countries   My university competes with other universities for …*   - public funding - a good image and public reputation - good students and staff - third-party funds   To what extent have you noticed other changes at your university over the past five to ten years?**   - Competition between my university and other universities has increased |

* 7-point scale from 0 = *gar nicht* (not at all) to 6 = *sehr stark* (very much).

** 7-point scale from 0 = *trifft gar nicht zu* (not at all) to 6 = *trifft sehr stark zu* (very much).

*Diversity of university communication*

| Index | Original question in the survey | English translation |
| --- | --- | --- |
| Diversity of target groups, (Calculations of Shannon diversity index) | An welche Zielgruppen richtet sich die Kommunikationsarbeit Ihrer Abteilung?*   - Mitarbeitende der Hochschule - Studierende und potenzielle Studierende - Alumni - Schweizer Bevölkerung - Kantonale Politik und Behörden - Nationale Politik und Behörden - Kleine und mittlere Unternehmen - Grossunternehmen - Lokale und regionale Medien - Nationale Medien - Internationale Medien | What are the target groups for the communication work of your department?*   - Own employees / university staff - Students and prospective students - Alumni - Swiss population - Politicians and public administration at the cantonal level - Politicians and public administration at the national level - Small- and medium-sized corporations - Large corporations - Local and regional news media - National news media - International news media |
| Diversity of communication channels  (Calculations of Shannon diversity index) | In welchem Masse nutzt Ihre Abteilung die folgenden Kanäle für Ihre Kommunikationsarbeit?*   - Klassische Medienarbeit - Social Media - Webseite - Hochschulzeitung oder -zeitschrift - Imagebroschüren und Imagefilme - Jahresberichte - Ausstellungen und Veranstaltungen (z.B. Tag der offenen Tür) - Selbst entwickelte mobile Apps | To what extent does your department use the following channels to communicate?*   - Traditional media relations - Social media - Website - University newspaper or magazine - Image brochures and image films - Annual reports - Exhibitions and events (e.g., open day) - Self-developed mobile apps |

* 7-point scale from 0 = *gar nicht* (not at all) to 6 = *sehr stark* (very much).

*Professionalism of university communication*

| Index | Original question in the survey | English translation |
| --- | --- | --- |
| Guidelines applied in communication department (Cronbach’s α = .67) | Inwiefern gelten in Ihrer Abteilung klare Regeln und Guidelines für die folgenden Bereiche?**   - Gendergerechte Sprache - Kommunikativer Umgang mit einer Krise - Bespielen von Social Media - Ethik der Organisationskommunikation | To what extent does your department have clear rules and guidelines for the following areas?**   - Gender-appropriate language - Communication in an organizational crisis - Use of social media - Ethics of organizational communication |
| Guidelines created for how the organization communicates (Cronbach’s α = .58) | Inwieweit stimmen Sie den folgenden Aussagen zu? Meine Abteilung … **   - stellt Regeln dazu auf, wie Hochschulangehörige auf Social Media kommunizieren sollten - stellt Regeln dazu auf, wie Hochschulangehörige mit JournalistInnen kommunizieren sollten | How much do you agree with the following statements?  My department ... **   - sets rules on how university members should communicate on social media - sets rules on how university members should communicate with journalists |
| Education of the communication staff (sum index) | Haben Sie in den folgenden Bereichen eine langjährige Berufserfahrung?   - Software-Entwicklung / Web-Programmierung - Mediengestaltung und -design - Journalismus (Print, Online oder Rundfunk) - PR- und Organisationskommunikation - Marketing - Hochschulverwaltung   Haben Sie in den folgenden Bereichen eine abgeschlossene Ausbildung / Weiterbildung?   - Software-Entwicklung / Web-Programmierung - Mediengestaltung und -design - Journalismus (Print, Online oder Rundfunk) - PR- und Organisationskommunikation - Marketing - Hochschulverwaltung   Waren die folgenden Bereiche Teil Ihres Studiums?   - Software-Entwicklung / Web-Programmierung - Mediengestaltung und -design - Journalismus (Print, Online oder Rundfunk) - PR- und Organisationskommunikation - Marketing - Hochschulverwaltung   Wie stark haben Sie sich in den vergangenen Jahren über folgende Themen auf dem Laufenden gehalten?*   - Wandel des Mediensystems - Social Media und deren Nutzungsmöglichkeiten - Ethische Grundsätze der Organisationskommunikation - Krisenkommunikation - Instrumente der Unternehmenskommunikation   Was ist Ihr höchster Bildungsabschluss?   - Obligatorische Schule - Lehre - Maturität / Abitur - Bachelorstudium - Master-, Magister, Lizentiats- oder Diplomstudium - Promotion - Anderer: ______ | Do you have a long-term professional experience in the following areas?   - Software development / web programming - Media production and design - Journalism (print, online or broadcasting) - PR and organizational communication - Marketing - University administration   Have you completed training / further training in the following areas?   - Software development / web programming - Media production and design - Journalism (print, online or broadcasting) - PR and organizational communication - Marketing - University administration   Were the following areas part of your academic studies?   - Software development / web programming - Media production and design - Journalism (print, online or broadcasting) - PR and organizational communication - Marketing - University administration   To what extent have you kept up to date with the following topics in recent years?*   - Changes in the media landscape - Social media and their potential uses - Ethical guidelines for organizational communication - Crisis communication - Instruments of corporate communication   What is your highest level of education?   - Mandatory schooling - Apprenticeship degree - High school diploma - Bachelor’s degree - Master’s degree - Doctoral degree - Other: ______ |

* 7-point scale from 0 = *gar nicht* (not at all) to 6 = *sehr stark* (very much).

**7-point scale from 0 = *trifft gar nicht zu* (not at all) to 6 = *trifft sehr stark zu* (very much).

*Strategic orientation of university communication*

| Item / Index | Original question in the survey | English translation |
| --- | --- | --- |
| Importance of communication strategies, plans, and evaluations  (Cronbach’s α = .75) | Inwieweit stimmen Sie den folgenden Aussagen zu? Meine Abteilung … **   - orientiert sich an Kommunikationsstrategien und  -plänen - nutzt Evaluationen, um Massnahmen und Prozesse zu optimieren - orientiert sich in ihrer Arbeit an klaren Zielen   Es wird viel über den Wandel der Hochschulkommunikation diskutiert. Welche Veränderungen haben Sie persönlich in den vergangenen fünf bis zehn Jahren beobachtet? Die zentralen Stellen für Hochschulkommunikation an meiner Hochschule ... **   - orientieren sich zunehmend an Kommunikationsstrategien und -plänen | How much do you agree with the following statements?  My department ... **   - is guided by communication strategies and plans - uses evaluations to optimize measures and processes - is guided by clear objectives   There is a lot of discussion about changes in university communication. What changes have you personally seen over the past five to ten years? The central communication department at my university ... **   - is increasingly guided by communication strategies and plans |
| Goals set by university leader | Inwieweit stimmen Sie den folgenden Aussagen zu? Meine Abteilung …**   - bekommt Ziele von der Hochschulleitung vorgegeben | How much do you agree with the following statements?  My department ... **   - is given targets by the university leadership |

** 7-point scale from 0 = *trifft gar nicht zu* (not at all) to 6 = *trifft sehr stark zu* (very much).
